# Supplementary material for: The Mechanistic Differences in HLA-Associated Carbamazepine Hypersensitivity
Source: MDPI journal article supplement (doi:10.3390/pharmaceutics11100536), 2019-10-15
Supplement: s1 [file s1]

# Supplementary Materials: The Mechanistic Differences in HLA-Associated Carbamazepine Hypersensitivity

Gwendolin S. Simper, Lareen S. Gräser, Alexander A. Celik, Joachim Kuhn, Heike Kunze-Schumacher, Gia-Gia T. Hò, Rainer Blasczyk, Andreas Pich and Christina Bade-Doeding

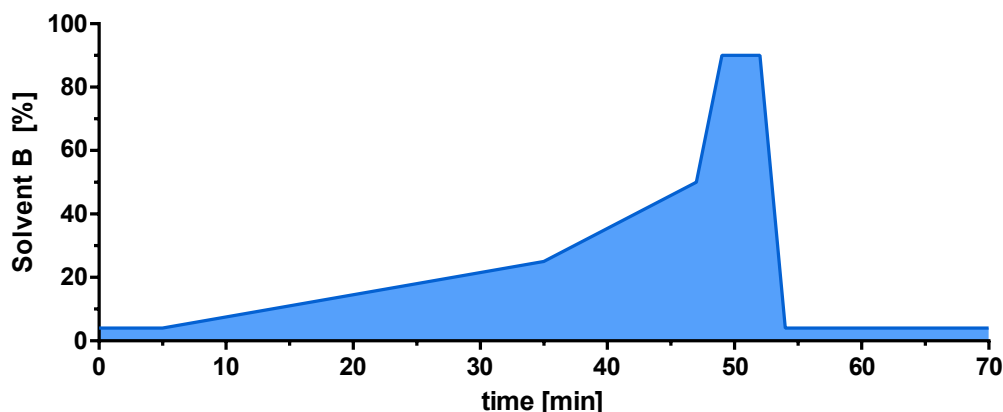

Figure S1. Solvent gradient for LC-MS analysis of peptides.

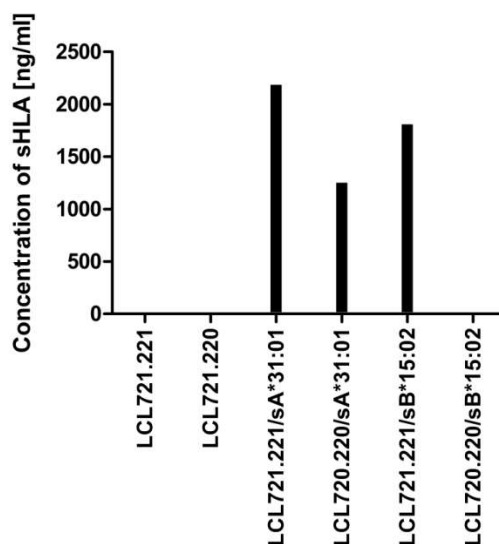

**Figure S2.** Production of sA\*31:01 is independent of TPN, whereas sB\*15:02 requires TPN. The TPN+ cell line *LCL721.221* and the TPN- cell line *LCL721.220* were lentivirally transduced with vectors encoding for sA\*31:01 or B\*15:02. The concentration of sHLA in cell culture supernatant of untransduced and transduced *LCL721.221* and *LCL721.220* cells was determined via HLA class I specific ELISA.

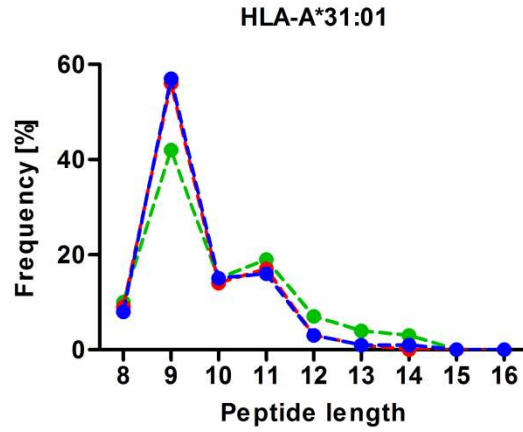

**Figure S3.** Length of presented peptides after drug treatment. The length of peptides bound to sA\*31:01 without (blue) treatment and after treatment with CBZ (red) and EPX (green).

**Table S1.** Amino acid frequencies in sA\*31:01-restricted low binding peptides produced in LCL721.221 cells.

| AA | P1  | P2  | P3  | P4  | P5  | P6  | P7  | P8 | P9  | P10 | P11 | PΩ  |
|----|-----|-----|-----|-----|-----|-----|-----|----|-----|-----|-----|-----|
| H  | 3%  | 0%  | 2%  | 1%  | 2%  | 4%  | 6%  | 4% | 2%  | 2%  | 1%  | 1%  |
| K  | 25% | 2%  | 24% | 7%  | 9%  | 7%  | 6%  | 9% | 6%  | 10% | 11% | 9%  |
| R  | 20% | 1%  | 4%  | 1%  | 1%  | 1%  | 1%  | 7% | 55% | 31% | 67% | 82% |
| D  | 1%  | 1%  | 2%  | 7%  | 3%  | 2%  | 2%  | 2% | 1%  | 1%  | 0%  | 0%  |
| E  | 1%  | 0%  | 2%  | 11% | 4%  | 5%  | 5%  | 7% | 2%  | 2%  | 1%  | 0%  |
| C  | 0%  | 0%  | 0%  | 0%  | 0%  | 0%  | 0%  | 0% | 0%  | 0%  | 0%  | 0%  |
| N  | 1%  | 2%  | 10% | 5%  | 5%  | 3%  | 4%  | 6% | 3%  | 3%  | 1%  | 0%  |
| P  | 0%  | 1%  | 1%  | 8%  | 9%  | 3%  | 4%  | 4% | 3%  | 4%  | 2%  | 1%  |
| Q  | 4%  | 10% | 12% | 7%  | 6%  | 5%  | 7%  | 9% | 3%  | 8%  | 0%  | 1%  |
| S  | 11% | 15% | 7%  | 9%  | 9%  | 6%  | 7%  | 7% | 5%  | 6%  | 3%  | 0%  |
| T  | 3%  | 17% | 3%  | 8%  | 5%  | 7%  | 9%  | 5% | 3%  | 3%  | 2%  | 0%  |
| A  | 14% | 9%  | 7%  | 10% | 8%  | 7%  | 10% | 9% | 3%  | 5%  | 2%  | 1%  |
| G  | 5%  | 7%  | 4%  | 10% | 8%  | 9%  | 5%  | 6% | 3%  | 6%  | 2%  | 1%  |
| I  | 3%  | 4%  | 4%  | 3%  | 7%  | 8%  | 6%  | 4% | 2%  | 2%  | 0%  | 0%  |
| L  | 2%  | 8%  | 8%  | 6%  | 8%  | 13% | 8%  | 8% | 3%  | 6%  | 3%  | 2%  |
| M  | 1%  | 2%  | 2%  | 1%  | 0%  | 1%  | 1%  | 1% | 1%  | 2%  | 0%  | 0%  |
| V  | 5%  | 17% | 3%  | 5%  | 10% | 11% | 15% | 9% | 4%  | 6%  | 1%  | 1%  |
| F  | 1%  | 1%  | 3%  | 1%  | 3%  | 4%  | 2%  | 1% | 1%  | 1%  | 0%  | 0%  |
| W  | 0%  | 0%  | 0%  | 0%  | 0%  | 1%  | 0%  | 0% | 0%  | 0%  | 0%  | 0%  |
| Y  | 0%  | 3%  | 2%  | 1%  | 2%  | 2%  | 3%  | 2% | 1%  | 1%  | 0%  | 0%  |

**Table S2.** Amino acid frequencies in sA\*31:01-restricted high binding peptides produced in LCL721.221 cells.

| AA | P1  | P2  | P3  | P4  | P5  | P6  | P7  | P8  | P9  | P10 | P11 | P $\Omega$ |
|----|-----|-----|-----|-----|-----|-----|-----|-----|-----|-----|-----|------------|
| H  | 2%  | 0%  | 0%  | 0%  | 1%  | 3%  | 2%  | 2%  | 1%  | 1%  | 0%  | 0%         |
| K  | 19% | 2%  | 21% | 5%  | 7%  | 8%  | 4%  | 6%  | 4%  | 6%  | 10% | 8%         |
| R  | 9%  | 1%  | 2%  | 0%  | 1%  | 1%  | 2%  | 7%  | 59% | 32% | 59% | 84%        |
| D  | 0%  | 1%  | 2%  | 6%  | 3%  | 2%  | 1%  | 2%  | 0%  | 2%  | 1%  | 0%         |
| E  | 0%  | 1%  | 2%  | 10% | 4%  | 3%  | 4%  | 8%  | 1%  | 2%  | 4%  | 0%         |
| C  | 1%  | 0%  | 0%  | 0%  | 0%  | 0%  | 0%  | 0%  | 0%  | 0%  | 0%  | 0%         |
| N  | 2%  | 2%  | 13% | 6%  | 6%  | 3%  | 4%  | 9%  | 3%  | 4%  | 1%  | 0%         |
| P  | 0%  | 1%  | 2%  | 9%  | 9%  | 4%  | 5%  | 5%  | 3%  | 4%  | 0%  | 1%         |
| Q  | 5%  | 10% | 15% | 7%  | 4%  | 4%  | 6%  | 10% | 3%  | 6%  | 1%  | 1%         |
| S  | 11% | 19% | 9%  | 12% | 11% | 7%  | 10% | 9%  | 5%  | 6%  | 1%  | 1%         |
| T  | 7%  | 20% | 3%  | 10% | 9%  | 6%  | 10% | 5%  | 3%  | 3%  | 4%  | 0%         |
| A  | 21% | 6%  | 8%  | 13% | 8%  | 8%  | 11% | 10% | 4%  | 8%  | 4%  | 2%         |
| G  | 9%  | 9%  | 5%  | 12% | 7%  | 9%  | 4%  | 6%  | 2%  | 6%  | 4%  | 0%         |
| I  | 5%  | 4%  | 2%  | 1%  | 6%  | 7%  | 7%  | 2%  | 2%  | 3%  | 0%  | 0%         |
| L  | 2%  | 5%  | 6%  | 2%  | 9%  | 12% | 5%  | 7%  | 4%  | 7%  | 7%  | 1%         |
| M  | 1%  | 1%  | 1%  | 0%  | 1%  | 1%  | 1%  | 1%  | 0%  | 4%  | 0%  | 0%         |
| V  | 6%  | 17% | 4%  | 4%  | 12% | 13% | 17% | 7%  | 4%  | 6%  | 0%  | 1%         |
| F  | 0%  | 0%  | 2%  | 0%  | 2%  | 4%  | 2%  | 1%  | 1%  | 0%  | 0%  | 0%         |
| W  | 0%  | 0%  | 0%  | 1%  | 0%  | 0%  | 0%  | 1%  | 0%  | 0%  | 0%  | 0%         |
| Y  | 0%  | 1%  | 2%  | 2%  | 1%  | 3%  | 4%  | 2%  | 1%  | 1%  | 0%  | 0%         |

**Table S3.** Amino acid frequencies in sA\*31:01-restricted low binding peptides produced in LCL721.220 cells.

| AA | P1  | P2  | P3  | P4  | P5  | P6  | P7  | P8  | P9  | P10 | P11 | P $\Omega$ |
|----|-----|-----|-----|-----|-----|-----|-----|-----|-----|-----|-----|------------|
| H  | 4%  | 1%  | 0%  | 2%  | 1%  | 2%  | 1%  | 1%  | 1%  | 1%  | 0%  | 0%         |
| K  | 12% | 0%  | 21% | 8%  | 12% | 6%  | 7%  | 3%  | 7%  | 5%  | 13% | 10%        |
| R  | 31% | 0%  | 5%  | 1%  | 1%  | 4%  | 3%  | 5%  | 35% | 22% | 42% | 86%        |
| D  | 0%  | 1%  | 1%  | 16% | 3%  | 7%  | 2%  | 1%  | 0%  | 1%  | 0%  | 0%         |
| E  | 1%  | 0%  | 1%  | 12% | 5%  | 5%  | 3%  | 8%  | 4%  | 1%  | 1%  | 1%         |
| C  | 0%  | 0%  | 0%  | 0%  | 0%  | 0%  | 0%  | 0%  | 0%  | 0%  | 0%  | 0%         |
| N  | 1%  | 1%  | 5%  | 5%  | 3%  | 4%  | 8%  | 3%  | 4%  | 5%  | 1%  | 0%         |
| P  | 2%  | 1%  | 2%  | 12% | 10% | 3%  | 5%  | 5%  | 4%  | 1%  | 0%  | 0%         |
| Q  | 1%  | 4%  | 5%  | 3%  | 0%  | 3%  | 1%  | 6%  | 1%  | 5%  | 7%  | 0%         |
| S  | 12% | 6%  | 3%  | 6%  | 5%  | 5%  | 6%  | 8%  | 4%  | 9%  | 4%  | 0%         |
| T  | 5%  | 16% | 1%  | 5%  | 1%  | 5%  | 10% | 5%  | 8%  | 4%  | 3%  | 0%         |
| A  | 10% | 5%  | 2%  | 5%  | 8%  | 6%  | 6%  | 7%  | 4%  | 10% | 3%  | 0%         |
| G  | 5%  | 6%  | 3%  | 8%  | 10% | 10% | 5%  | 12% | 7%  | 8%  | 7%  | 1%         |
| I  | 6%  | 5%  | 8%  | 3%  | 9%  | 6%  | 12% | 6%  | 6%  | 3%  | 4%  | 1%         |
| L  | 2%  | 9%  | 16% | 3%  | 7%  | 10% | 10% | 11% | 4%  | 10% | 7%  | 1%         |
| M  | 1%  | 5%  | 3%  | 0%  | 1%  | 2%  | 1%  | 1%  | 1%  | 2%  | 3%  | 0%         |
| V  | 8%  | 28% | 4%  | 5%  | 12% | 8%  | 13% | 9%  | 6%  | 10% | 4%  | 0%         |
| F  | 1%  | 5%  | 8%  | 2%  | 6%  | 8%  | 5%  | 3%  | 3%  | 2%  | 0%  | 1%         |
| W  | 0%  | 0%  | 2%  | 1%  | 2%  | 2%  | 1%  | 1%  | 0%  | 0%  | 0%  | 0%         |
| Y  | 0%  | 8%  | 8%  | 2%  | 5%  | 4%  | 2%  | 5%  | 1%  | 0%  | 1%  | 0%         |

**Table S4.** Amino acid frequencies in sA\*31:01-restricted high binding peptides produced in LCL721.220 cells.

| AA | P1  | P2  | P3  | P4  | P5  | P6  | P7  | P8  | P9  | P10 | P11 | PΩ  |
|----|-----|-----|-----|-----|-----|-----|-----|-----|-----|-----|-----|-----|
| H  | 5%  | 0%  | 2%  | 0%  | 0%  | 0%  | 2%  | 2%  | 3%  | 4%  | 0%  | 0%  |
| K  | 7%  | 0%  | 28% | 12% | 16% | 21% | 7%  | 5%  | 13% | 8%  | 11% | 5%  |
| R  | 33% | 0%  | 2%  | 0%  | 2%  | 5%  | 5%  | 12% | 38% | 17% | 79% | 95% |
| D  | 0%  | 2%  | 0%  | 14% | 0%  | 5%  | 5%  | 0%  | 0%  | 0%  | 0%  | 0%  |
| E  | 0%  | 0%  | 0%  | 9%  | 0%  | 2%  | 2%  | 12% | 3%  | 0%  | 0%  | 0%  |
| C  | 0%  | 0%  | 0%  | 0%  | 0%  | 0%  | 0%  | 0%  | 0%  | 0%  | 0%  | 0%  |
| N  | 0%  | 5%  | 2%  | 5%  | 0%  | 0%  | 9%  | 2%  | 0%  | 0%  | 0%  | 0%  |
| P  | 2%  | 0%  | 2%  | 12% | 9%  | 2%  | 7%  | 5%  | 0%  | 0%  | 0%  | 0%  |
| Q  | 5%  | 5%  | 5%  | 0%  | 0%  | 0%  | 2%  | 5%  | 5%  | 8%  | 0%  | 0%  |
| S  | 12% | 5%  | 2%  | 5%  | 7%  | 2%  | 7%  | 5%  | 0%  | 21% | 5%  | 0%  |
| T  | 9%  | 16% | 0%  | 5%  | 5%  | 7%  | 2%  | 7%  | 8%  | 4%  | 0%  | 0%  |
| A  | 2%  | 0%  | 5%  | 5%  | 12% | 5%  | 9%  | 5%  | 3%  | 4%  | 0%  | 0%  |
| G  | 5%  | 9%  | 7%  | 12% | 9%  | 12% | 2%  | 5%  | 5%  | 13% | 5%  | 0%  |
| I  | 2%  | 12% | 14% | 5%  | 12% | 5%  | 16% | 7%  | 3%  | 0%  | 0%  | 0%  |
| L  | 5%  | 12% | 12% | 5%  | 9%  | 16% | 2%  | 16% | 8%  | 8%  | 0%  | 0%  |
| M  | 2%  | 2%  | 2%  | 0%  | 0%  | 2%  | 0%  | 2%  | 3%  | 0%  | 0%  | 0%  |
| V  | 9%  | 26% | 5%  | 7%  | 9%  | 7%  | 14% | 9%  | 8%  | 13% | 0%  | 0%  |
| F  | 2%  | 0%  | 7%  | 0%  | 5%  | 7%  | 5%  | 0%  | 3%  | 0%  | 0%  | 0%  |
| W  | 0%  | 2%  | 0%  | 0%  | 5%  | 0%  | 0%  | 0%  | 0%  | 0%  | 0%  | 0%  |
| Y  | 0%  | 5%  | 5%  | 7%  | 0%  | 2%  | 2%  | 2%  | 0%  | 0%  | 0%  | 0%  |

**Table S5.** Amino acid frequencies in sA\*31:01-restricted low binding peptides produced in LCL721.221 cells treated with EPX.

| AA | P1  | P2  | P3  | P4  | P5  | P6  | P7  | P8  | P9  | P10 | PΩ  |
|----|-----|-----|-----|-----|-----|-----|-----|-----|-----|-----|-----|
| H  | 2%  | 0%  | 1%  | 1%  | 1%  | 3%  | 6%  | 4%  | 1%  | 0%  | 0%  |
| K  | 24% | 2%  | 16% | 5%  | 8%  | 7%  | 7%  | 9%  | 7%  | 21% | 12% |
| R  | 17% | 1%  | 2%  | 2%  | 1%  | 1%  | 1%  | 8%  | 67% | 61% | 75% |
| D  | 1%  | 2%  | 2%  | 8%  | 4%  | 2%  | 2%  | 1%  | 0%  | 0%  | 0%  |
| E  | 1%  | 1%  | 3%  | 11% | 6%  | 5%  | 5%  | 6%  | 1%  | 1%  | 0%  |
| C  | 0%  | 0%  | 0%  | 0%  | 0%  | 0%  | 0%  | 0%  | 0%  | 0%  | 0%  |
| N  | 3%  | 3%  | 11% | 4%  | 4%  | 3%  | 3%  | 7%  | 1%  | 1%  | 0%  |
| P  | 0%  | 2%  | 2%  | 8%  | 8%  | 4%  | 3%  | 6%  | 2%  | 2%  | 1%  |
| Q  | 4%  | 7%  | 10% | 7%  | 5%  | 5%  | 9%  | 11% | 1%  | 3%  | 2%  |
| S  | 9%  | 14% | 6%  | 8%  | 8%  | 3%  | 6%  | 6%  | 1%  | 1%  | 1%  |
| T  | 3%  | 16% | 3%  | 7%  | 5%  | 5%  | 7%  | 5%  | 2%  | 1%  | 1%  |
| A  | 12% | 8%  | 7%  | 8%  | 6%  | 6%  | 9%  | 6%  | 2%  | 1%  | 1%  |
| G  | 6%  | 9%  | 4%  | 9%  | 6%  | 5%  | 2%  | 7%  | 2%  | 3%  | 2%  |
| I  | 4%  | 4%  | 6%  | 4%  | 9%  | 10% | 9%  | 4%  | 1%  | 0%  | 1%  |
| L  | 4%  | 8%  | 10% | 9%  | 11% | 16% | 11% | 7%  | 5%  | 4%  | 2%  |
| M  | 2%  | 2%  | 3%  | 1%  | 1%  | 2%  | 1%  | 1%  | 0%  | 1%  | 0%  |
| V  | 6%  | 15% | 4%  | 5%  | 10% | 13% | 14% | 7%  | 3%  | 1%  | 1%  |
| F  | 1%  | 2%  | 5%  | 1%  | 4%  | 5%  | 3%  | 2%  | 1%  | 1%  | 1%  |
| W  | 0%  | 0%  | 0%  | 0%  | 1%  | 1%  | 0%  | 0%  | 0%  | 1%  | 0%  |
| Y  | 1%  | 3%  | 4%  | 2%  | 3%  | 3%  | 3%  | 3%  | 1%  | 0%  | 0%  |

**Table S6.** Amino acid frequencies in sA\*31:01-restricted high binding peptides produced in LCL721.221 cells treated with EPX.

| AA | P1  | P2  | P3  | P4  | P5  | P6  | P7  | P8 | P9  | P10 | P11 | P $\Omega$ |
|----|-----|-----|-----|-----|-----|-----|-----|----|-----|-----|-----|------------|
| H  | 3%  | 0%  | 1%  | 0%  | 1%  | 3%  | 4%  | 2% | 2%  | 2%  | 1%  | 1%         |
| K  | 21% | 2%  | 21% | 6%  | 6%  | 5%  | 6%  | 7% | 7%  | 8%  | 14% | 19%        |
| R  | 17% | 1%  | 4%  | 1%  | 1%  | 1%  | 1%  | 5% | 41% | 21% | 38% | 71%        |
| D  | 1%  | 2%  | 2%  | 10% | 5%  | 4%  | 3%  | 4% | 2%  | 2%  | 3%  | 0%         |
| E  | 1%  | 2%  | 4%  | 11% | 6%  | 6%  | 6%  | 8% | 2%  | 6%  | 6%  | 1%         |
| C  | 0%  | 0%  | 0%  | 0%  | 0%  | 0%  | 0%  | 0% | 0%  | 0%  | 0%  | 0%         |
| N  | 2%  | 2%  | 10% | 6%  | 6%  | 4%  | 4%  | 7% | 3%  | 5%  | 3%  | 0%         |
| P  | 0%  | 1%  | 2%  | 9%  | 8%  | 5%  | 4%  | 5% | 2%  | 4%  | 1%  | 1%         |
| Q  | 2%  | 7%  | 11% | 6%  | 5%  | 5%  | 6%  | 8% | 4%  | 8%  | 2%  | 2%         |
| S  | 9%  | 15% | 6%  | 9%  | 9%  | 7%  | 8%  | 7% | 3%  | 7%  | 3%  | 1%         |
| T  | 5%  | 18% | 3%  | 8%  | 6%  | 6%  | 8%  | 6% | 5%  | 3%  | 6%  | 0%         |
| A  | 13% | 7%  | 6%  | 10% | 7%  | 7%  | 8%  | 9% | 4%  | 8%  | 4%  | 1%         |
| G  | 7%  | 9%  | 5%  | 9%  | 9%  | 9%  | 6%  | 7% | 4%  | 6%  | 3%  | 1%         |
| I  | 4%  | 3%  | 4%  | 3%  | 7%  | 9%  | 7%  | 4% | 3%  | 2%  | 3%  | 0%         |
| L  | 3%  | 7%  | 8%  | 5%  | 6%  | 12% | 7%  | 8% | 5%  | 5%  | 6%  | 2%         |
| M  | 1%  | 2%  | 3%  | 0%  | 1%  | 0%  | 1%  | 1% | 1%  | 1%  | 0%  | 0%         |
| V  | 7%  | 17% | 4%  | 4%  | 11% | 9%  | 15% | 9% | 7%  | 8%  | 3%  | 0%         |
| F  | 1%  | 1%  | 4%  | 2%  | 3%  | 3%  | 2%  | 2% | 2%  | 1%  | 1%  | 0%         |
| W  | 0%  | 0%  | 0%  | 1%  | 1%  | 1%  | 0%  | 0% | 1%  | 0%  | 0%  | 0%         |
| Y  | 1%  | 4%  | 3%  | 1%  | 2%  | 4%  | 4%  | 3% | 2%  | 2%  | 2%  | 0%         |

**Table S7.** Amino acid frequencies in sA\*31:01-restricted low binding peptides produced in LCL721.221 cells treated with CBZ.

| AA | P1  | P2  | P3  | P4  | P5  | P6  | P7  | P8 | P9  | P10 | P11 | P $\Omega$ |
|----|-----|-----|-----|-----|-----|-----|-----|----|-----|-----|-----|------------|
| H  | 2%  | 0%  | 2%  | 1%  | 2%  | 4%  | 6%  | 5% | 2%  | 1%  | 1%  | 1%         |
| K  | 27% | 2%  | 27% | 7%  | 8%  | 8%  | 7%  | 8% | 7%  | 9%  | 14% | 11%        |
| R  | 19% | 1%  | 4%  | 1%  | 1%  | 1%  | 1%  | 7% | 54% | 34% | 60% | 80%        |
| D  | 0%  | 1%  | 2%  | 7%  | 3%  | 2%  | 3%  | 2% | 1%  | 1%  | 1%  | 1%         |
| E  | 1%  | 1%  | 3%  | 12% | 5%  | 5%  | 5%  | 6% | 2%  | 4%  | 2%  | 1%         |
| C  | 0%  | 0%  | 0%  | 0%  | 0%  | 0%  | 0%  | 0% | 0%  | 0%  | 0%  | 0%         |
| N  | 2%  | 2%  | 10% | 5%  | 4%  | 2%  | 4%  | 7% | 3%  | 4%  | 1%  | 0%         |
| P  | 1%  | 1%  | 1%  | 8%  | 9%  | 4%  | 4%  | 5% | 2%  | 2%  | 0%  | 1%         |
| Q  | 3%  | 9%  | 11% | 8%  | 5%  | 5%  | 7%  | 8% | 3%  | 6%  | 2%  | 1%         |
| S  | 10% | 15% | 6%  | 10% | 9%  | 6%  | 6%  | 8% | 4%  | 7%  | 4%  | 0%         |
| T  | 4%  | 20% | 3%  | 7%  | 4%  | 8%  | 8%  | 6% | 3%  | 4%  | 5%  | 1%         |
| A  | 13% | 7%  | 6%  | 10% | 8%  | 7%  | 9%  | 8% | 3%  | 6%  | 3%  | 1%         |
| G  | 6%  | 7%  | 4%  | 10% | 8%  | 9%  | 5%  | 6% | 3%  | 8%  | 2%  | 1%         |
| I  | 3%  | 3%  | 4%  | 3%  | 8%  | 9%  | 7%  | 4% | 1%  | 1%  | 2%  | 0%         |
| L  | 3%  | 7%  | 7%  | 7%  | 8%  | 12% | 9%  | 8% | 5%  | 6%  | 3%  | 2%         |
| M  | 1%  | 3%  | 2%  | 0%  | 0%  | 1%  | 1%  | 1% | 1%  | 1%  | 1%  | 0%         |
| V  | 5%  | 19% | 4%  | 5%  | 12% | 13% | 15% | 8% | 5%  | 5%  | 2%  | 1%         |
| F  | 1%  | 1%  | 3%  | 0%  | 2%  | 2%  | 2%  | 1% | 1%  | 1%  | 0%  | 0%         |
| W  | 0%  | 0%  | 0%  | 0%  | 0%  | 0%  | 0%  | 0% | 0%  | 0%  | 0%  | 0%         |
| Y  | 0%  | 2%  | 2%  | 1%  | 1%  | 3%  | 2%  | 2% | 1%  | 0%  | 1%  | 0%         |

**Table S8.** Amino acid frequencies in sA\*31:01-restricted high binding peptides produced in LCL721.221 cells treated with CBZ.

| AA | P1  | P2  | P3  | P4  | P5  | P6  | P7  | P8  | P9  | P10 | P11 | PΩ  |
|----|-----|-----|-----|-----|-----|-----|-----|-----|-----|-----|-----|-----|
| H  | 0%  | 0%  | 0%  | 0%  | 4%  | 9%  | 7%  | 7%  | 4%  | 3%  | 0%  | 2%  |
| K  | 44% | 0%  | 42% | 7%  | 11% | 10% | 14% | 14% | 2%  | 8%  | 11% | 5%  |
| R  | 21% | 1%  | 0%  | 0%  | 0%  | 0%  | 0%  | 0%  | 51% | 29% | 70% | 93% |
| D  | 0%  | 0%  | 0%  | 7%  | 5%  | 4%  | 1%  | 1%  | 0%  | 0%  | 0%  | 0%  |
| E  | 0%  | 0%  | 1%  | 14% | 1%  | 2%  | 0%  | 7%  | 2%  | 3%  | 4%  | 0%  |
| C  | 0%  | 0%  | 0%  | 0%  | 0%  | 0%  | 0%  | 0%  | 1%  | 0%  | 0%  | 0%  |
| N  | 0%  | 1%  | 15% | 10% | 4%  | 2%  | 4%  | 6%  | 4%  | 0%  | 0%  | 0%  |
| P  | 0%  | 0%  | 0%  | 5%  | 4%  | 0%  | 1%  | 2%  | 5%  | 3%  | 0%  | 0%  |
| Q  | 2%  | 6%  | 9%  | 2%  | 1%  | 2%  | 7%  | 9%  | 4%  | 5%  | 0%  | 0%  |
| S  | 2%  | 21% | 7%  | 15% | 7%  | 6%  | 4%  | 7%  | 4%  | 3%  | 0%  | 0%  |
| T  | 1%  | 22% | 1%  | 6%  | 7%  | 2%  | 6%  | 4%  | 2%  | 3%  | 0%  | 0%  |
| A  | 12% | 7%  | 5%  | 6%  | 9%  | 11% | 10% | 10% | 5%  | 8%  | 4%  | 0%  |
| G  | 2%  | 5%  | 1%  | 16% | 12% | 5%  | 7%  | 5%  | 1%  | 13% | 0%  | 0%  |
| I  | 5%  | 2%  | 5%  | 1%  | 12% | 7%  | 7%  | 4%  | 4%  | 5%  | 0%  | 0%  |
| L  | 0%  | 9%  | 5%  | 4%  | 9%  | 19% | 11% | 9%  | 7%  | 3%  | 7%  | 0%  |
| M  | 1%  | 1%  | 2%  | 0%  | 0%  | 0%  | 0%  | 4%  | 0%  | 3%  | 0%  | 0%  |
| V  | 6%  | 22% | 4%  | 5%  | 12% | 15% | 16% | 7%  | 2%  | 13% | 0%  | 0%  |
| F  | 1%  | 0%  | 2%  | 1%  | 1%  | 2%  | 0%  | 0%  | 1%  | 0%  | 0%  | 0%  |
| W  | 0%  | 0%  | 0%  | 0%  | 0%  | 0%  | 0%  | 0%  | 0%  | 0%  | 0%  | 0%  |
| Y  | 0%  | 1%  | 0%  | 0%  | 0%  | 2%  | 4%  | 4%  | 0%  | 0%  | 4%  | 0%  |
